# Supplementary material
Source: Springer Nature journal article supplement (https://www.springermedizin.de/resource/supplementary/12936_2006_219_MOESM3_ESM.pdf/9547224)

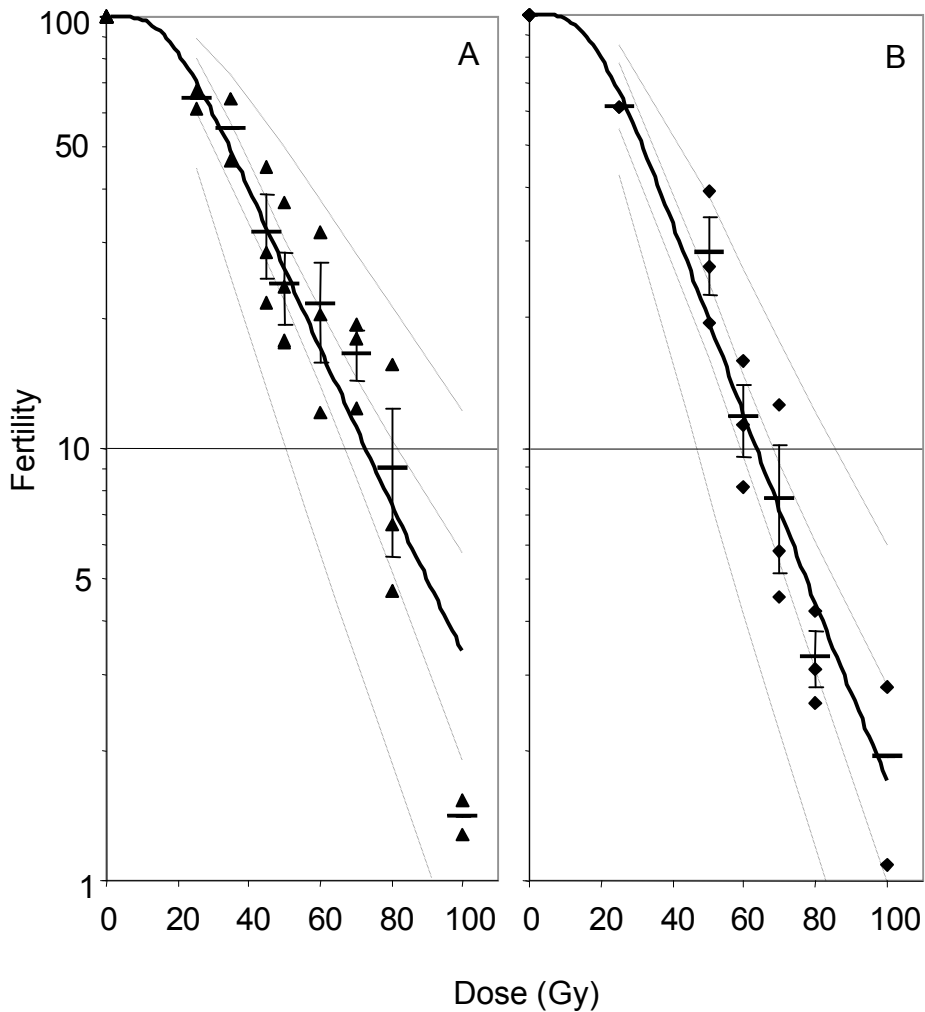

Supplement: MOESM3 [file 9547224]
